# Supplementary material for: Origin of extra capacity in the solid electrolyte interphase near high-capacity iron carbide anodes for Li ion batteries
Source: Royal Society of Chemistry journal article supplement (doi:10.1039/c9ee04062e), 2020-01-01
Supplement: c9ee04062e1.pdf [file c9ee04062e1.pdf]

## **Origin of extra capacity in the solid electrolyte interphase near high-capacity iron carbide anode for Li ion batteries**

Dongjiang Chen<sup>1</sup>, Chao Feng<sup>1</sup>, Yupei Han<sup>1</sup>, Bo Yu<sup>1</sup>, Wei Chen<sup>1</sup>, Ziqi Zhou<sup>1</sup>, Ning  
Chen<sup>1</sup>, John B. Goodenough<sup>2</sup>, Weidong He<sup>1,3\*</sup>

<sup>1</sup>School of Physics, University of Electronic Science and Technology of China,  
Chengdu 611731, China

<sup>2</sup>Materials Science and Engineering Program & Texas Materials Institute, The  
University of Texas at Austin, Austin TX 78712, USA

<sup>3</sup>National Key Laboratory of Science and Technology on Advanced Composites in  
Special Environments, and Center for Composite Materials and Structures, Harbin  
Institute of Technology, Harbin 150080, China

E-mail: *weidong.he@uestc.edu.cn*

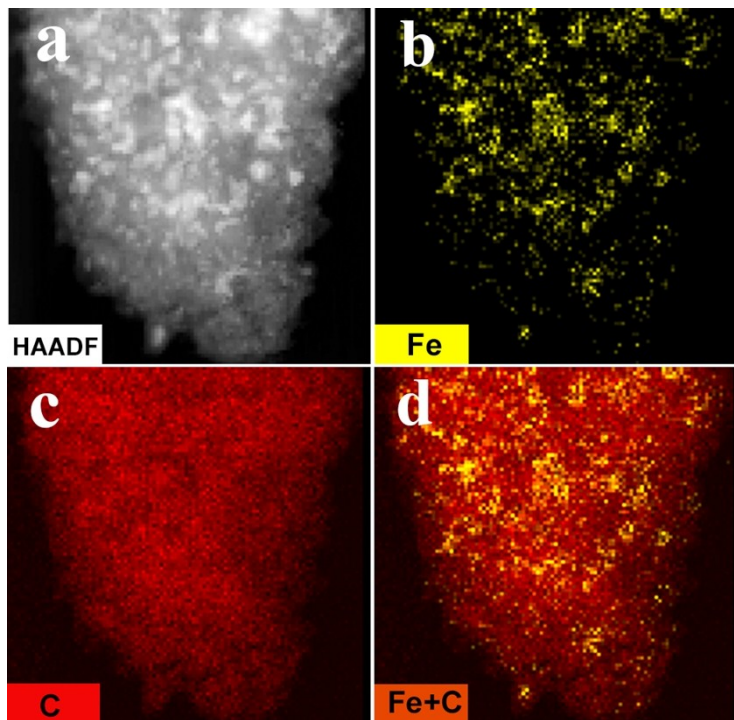

**Supplementary Figure 1 | a-d,** TEM image and the corresponding mapping images of core-shell C@Fe<sub>3</sub>C/Fe powders.

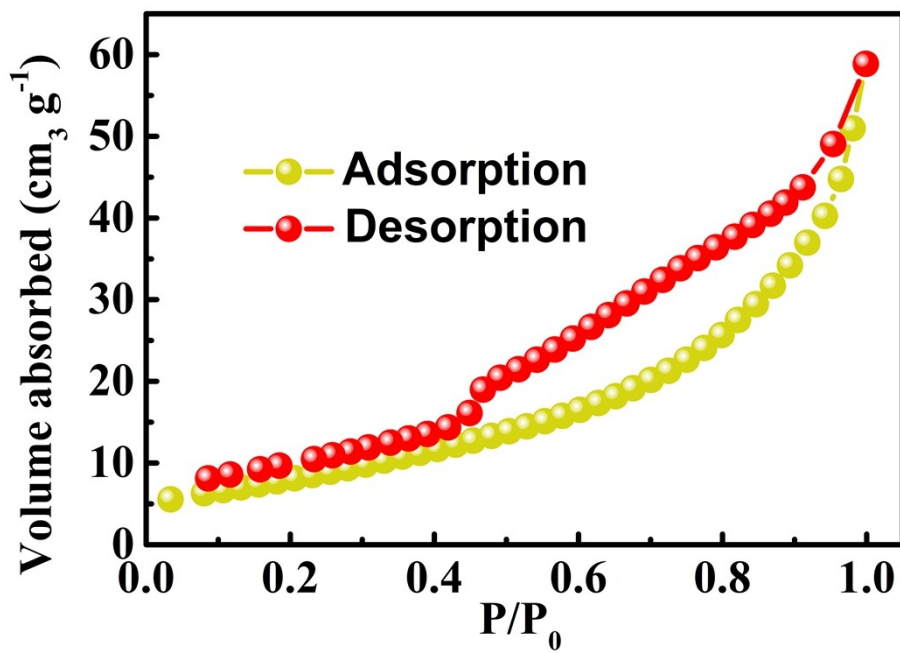

Supplementary Figure 2 | N<sub>2</sub> adsorption/desorption isotherm of the core-shell C@Fe<sub>3</sub>C/Fe powders.

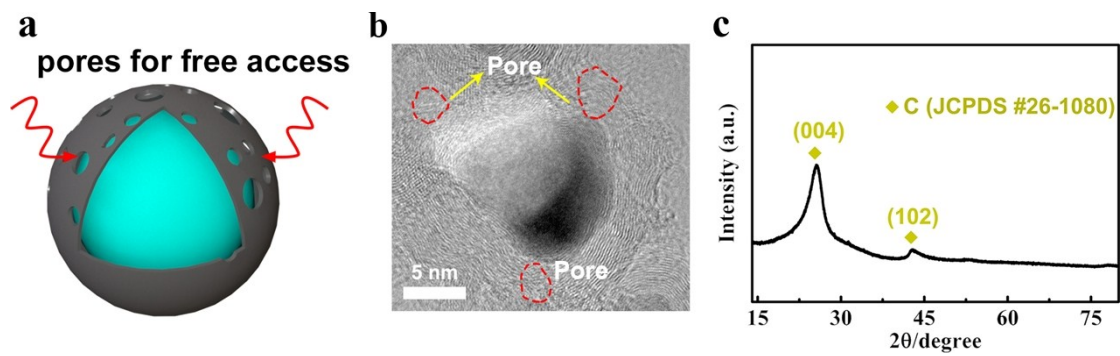

**Supplementary Figure 3** | **a**, Schematics of the porous core-shell architecture. **b**, TEM image of the C@Fe<sub>3</sub>C/Fe nanoparticle. **c**, XRD pattern of the carbonaceous powders after removing iron species from C@Fe<sub>3</sub>C/Fe powders.

The calculations of Fe and Fe<sub>3</sub>C mass contents in C@Fe<sub>3</sub>C/Fe nanoparticles based on TGA analysis are as follows:

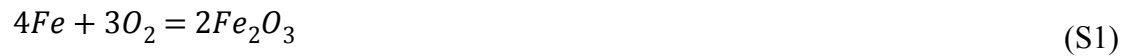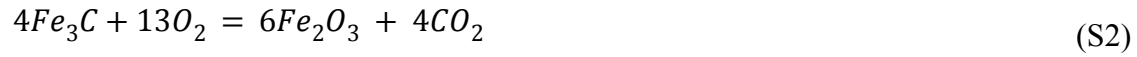

$$m_{Fe} (\%) = \frac{2}{3} \times m_O (\%) \times \frac{M_{Fe}}{M_O} \quad (S3)$$

$$m_{Fe_2O_3}' (\%) = \frac{1}{3} \times m_O (\%) \times \frac{M_{Fe_2O_3}'}{M_O} \quad (S4)$$

$$m_{Fe_3C} (\%) = \frac{2}{3} \times (m_{Fe_2O_3} - m_{Fe_2O_3}') (\%) \times \frac{M_{Fe_3C}}{M_{Fe_2O_3}} \quad (S5)$$

where  $m_O$  (%) of 6 wt. % is the weight increase in the range of 190 °C ~ 410 °C, which is attributed to oxygen from the change of Fe to Fe<sub>2</sub>O<sub>3</sub>.  $m_{Fe}$  (%) is the mass percentage of Fe nanoparticles in the C@Fe<sub>3</sub>C/Fe compound.  $m_{Fe_2O_3}$  (%) of 43 wt. % is the total mass of Fe<sub>2</sub>O<sub>3</sub> arising from Fe and Fe<sub>3</sub>C together when the temperature is raised at 900 °C.  $m_{Fe_2O_3}'$  (%) is the mass percentage of Fe<sub>2</sub>O<sub>3</sub>, as calculated based on Equation (S1).  $m_{Fe_3C}$  (%) is the mass percentage of Fe<sub>3</sub>C in C@Fe<sub>3</sub>C/Fe nanoparticles.  $M_{Fe}$ ,  $M_O$ ,  $M_{Fe_2O_3}$  and  $M_{Fe_3C}$  are the molar masses of Fe, O, Fe<sub>2</sub>O<sub>3</sub> and Fe<sub>3</sub>C. As a result, the Fe and Fe<sub>3</sub>C contents in the composite are 14 wt. % and 17 wt. %, respectively.

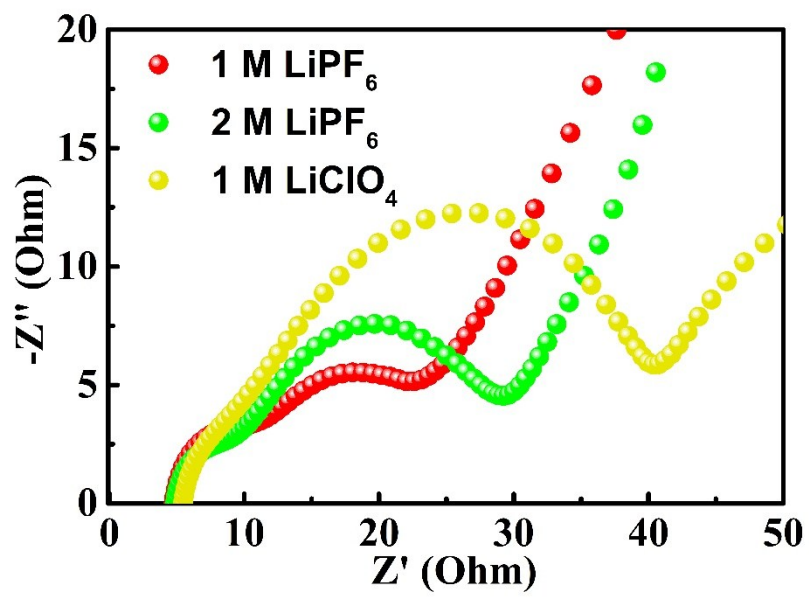

**Supplementary Figure 4** | Post-cycle EIS of batteries with 1 M LiPF<sub>6</sub>, 2 M LiPF<sub>6</sub> and 1 M LiClO<sub>4</sub> electrolytes.

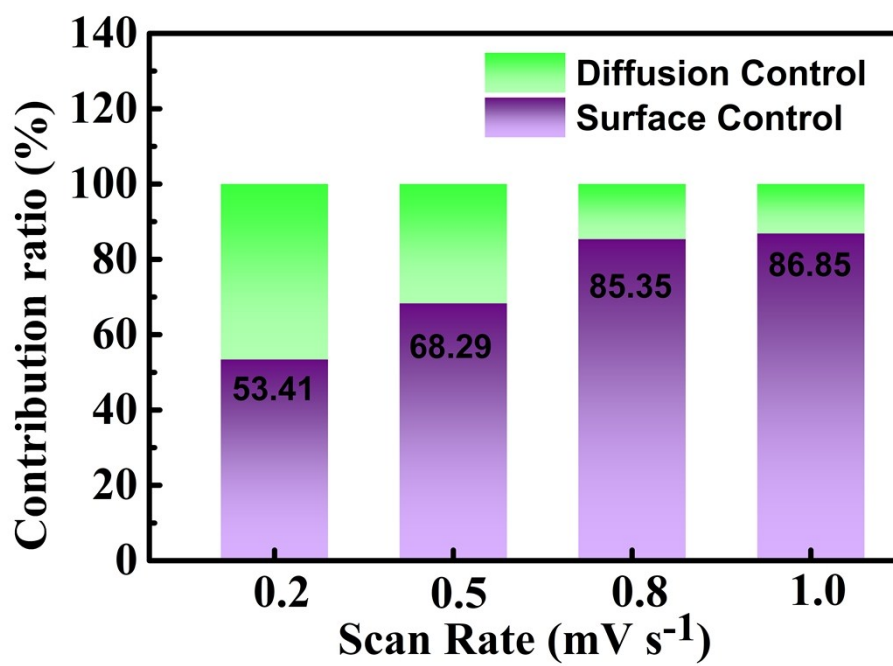

**Supplementary Figure 5** | Current response of C@Fe<sub>3</sub>C/Fe nanoparticles at various scan rates.

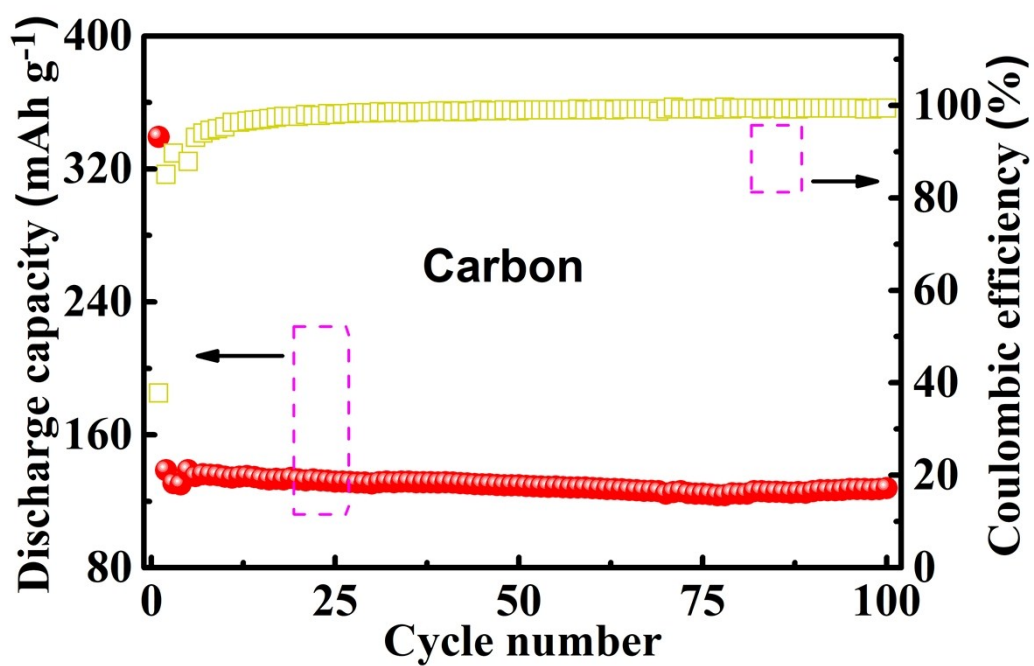

**Supplementary Figure 6** | Cycling performances and Coulombic efficiencies of carbon anode

with 1 M LiFP6 with a current density of  $1 \text{ A g}^{-1}$ .



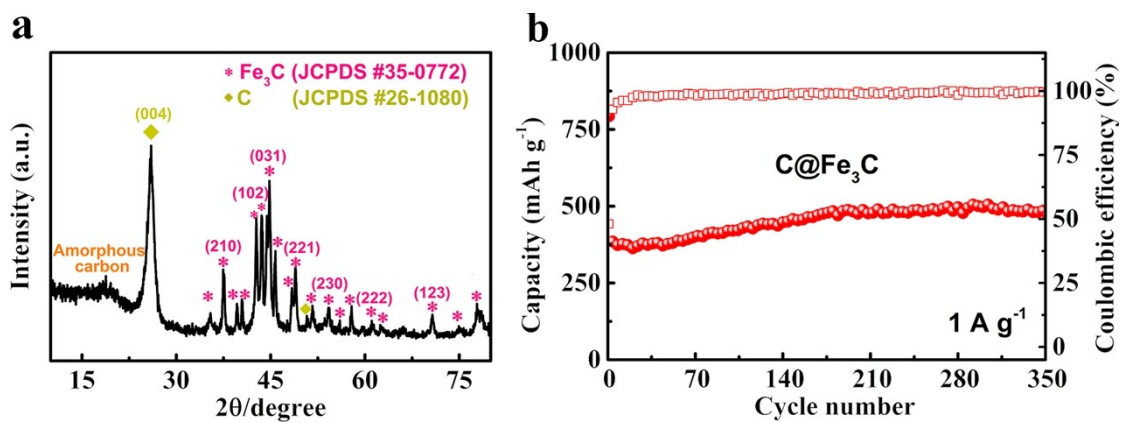

**Supplementary Figure 7 | a**, XRD patterns and **b**, Cyclic performance of C@Fe<sub>3</sub>C anode.

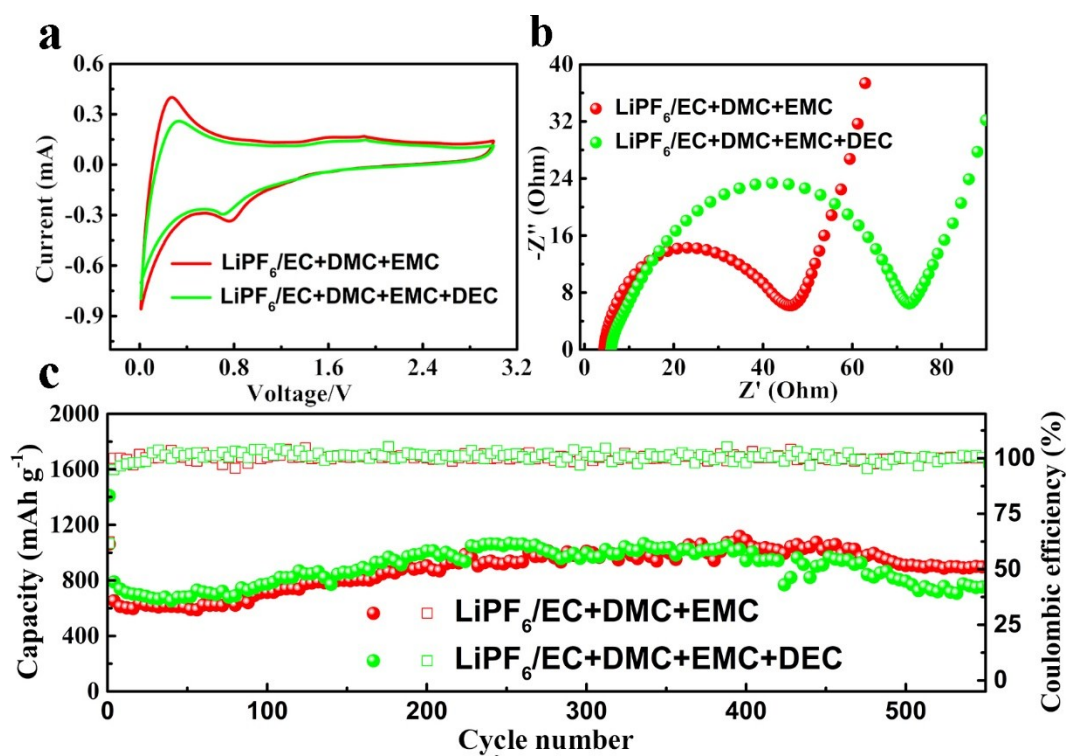

**Supplementary Figure 8** | **a**, CV curves (recorded at 0.5 mV/s). **b**, EIS curves (recorded at 0.10 Hz to 1.0 MHz) and **c**, cycle performances (recorded at  $1 \text{ A g}^{-1}$ ) of the  $\text{C}@Fe_3\text{C}/\text{Fe}$  anode with 1 M  $\text{LiPF}_6/\text{EC}+\text{DMC}+\text{EMC}$  electrolyte and 1 M  $\text{LiPF}_6/\text{EC}+\text{DMC}+\text{EMC}+\text{DEC}$  electrolyte.

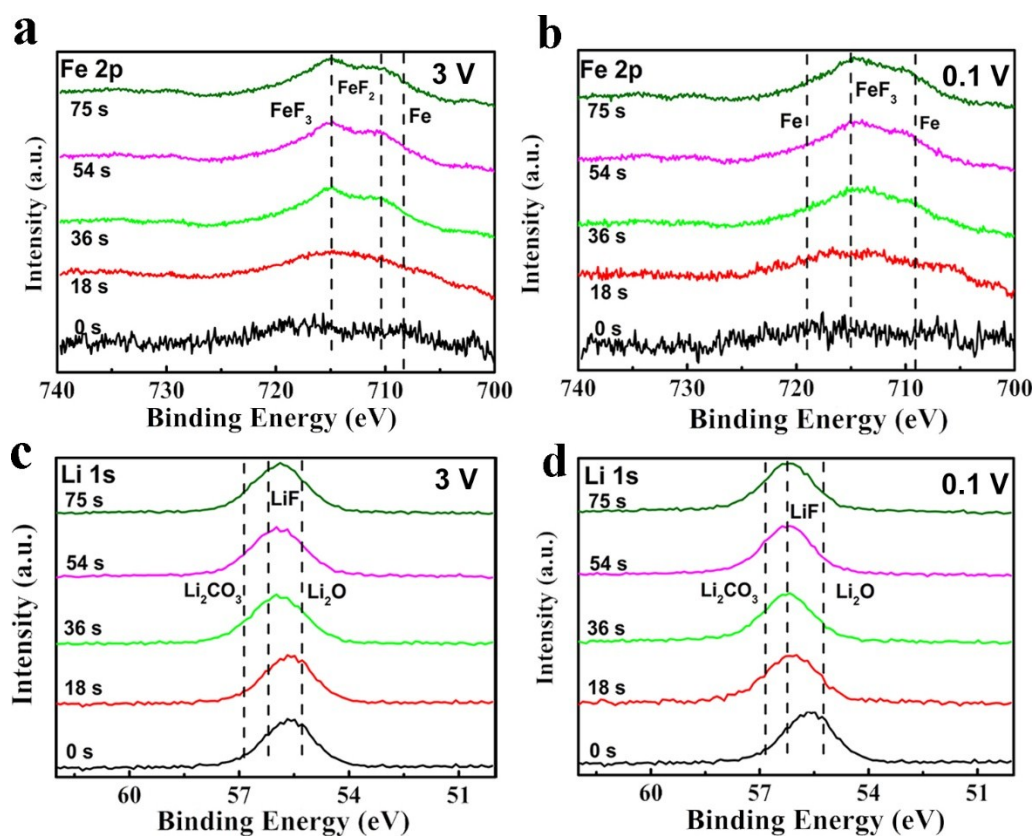

**Supplementary Figure 9 | a, b Fe 2p and c, d Li 1s XPS spectra of the SEI on C@Fe<sub>3</sub>C/Fe anode after various etching times at 3 V and 0.1 V, respectively (the surface at 0 s).**

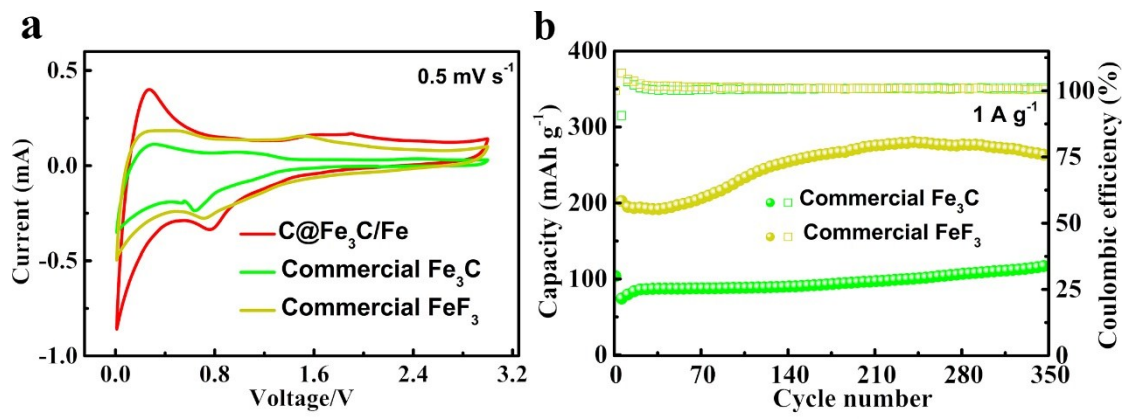

**Supplementary Figure 10** | **a**, CV curves at 0.5 mV/s and **b**, Cyclic performances and Coulombic efficiencies of commercial Fe<sub>3</sub>C and FeF<sub>3</sub> electrodes at a current density of 1 A g<sup>-1</sup>.

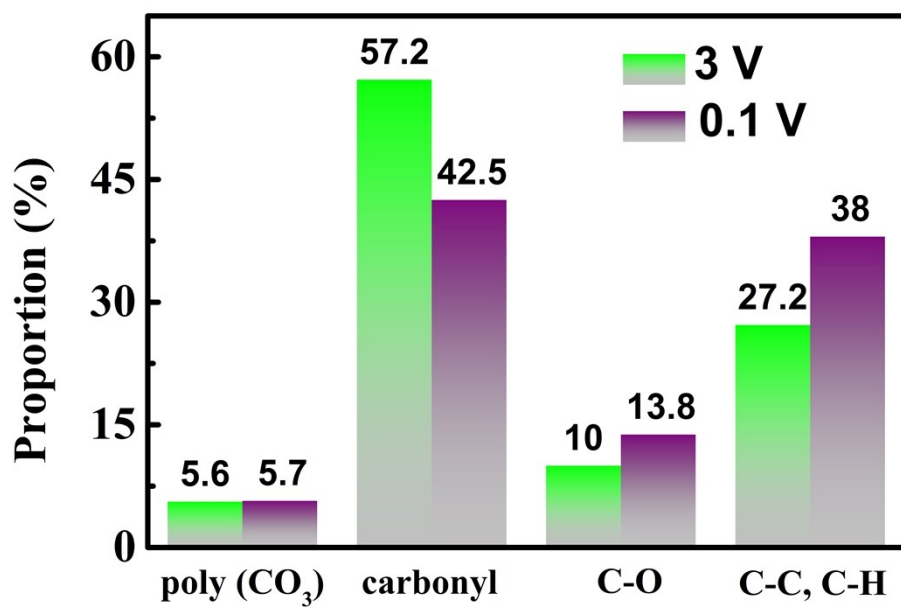

**Supplementary Figure 11** | The variation of the SEI composition during the electrochemical reactions.

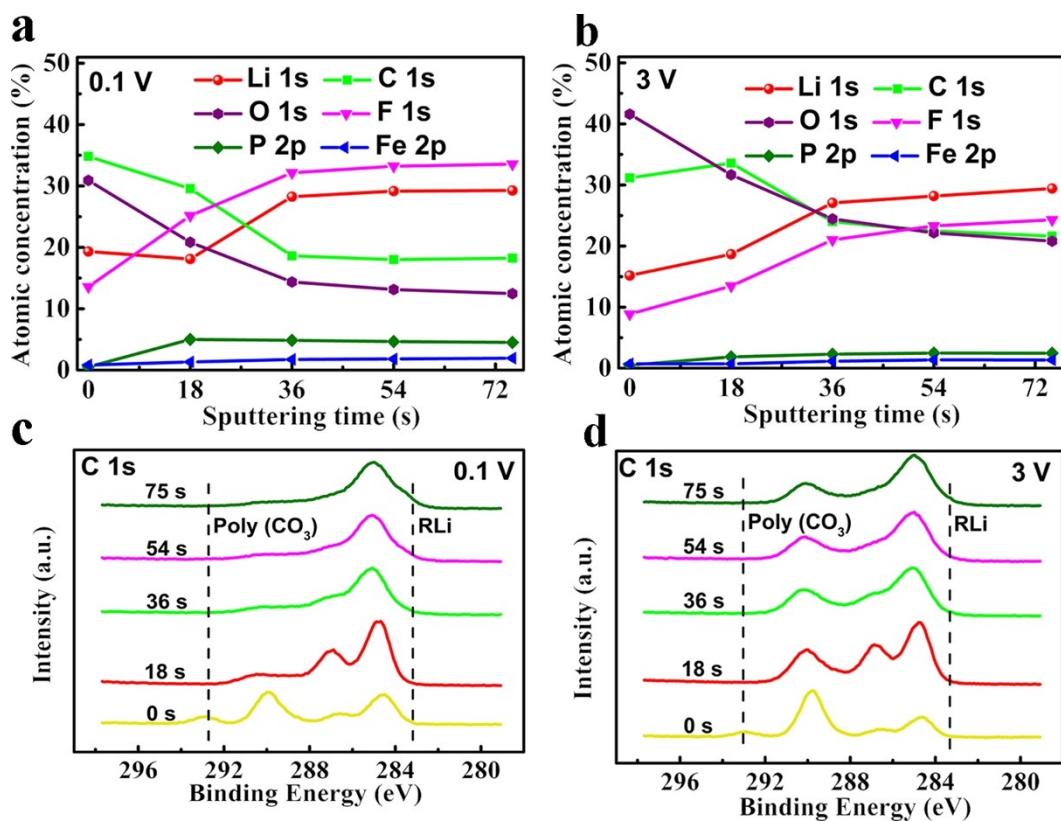

**Supplementary Figure 12** | **a, b** Depth profiles of the XPS spectra for the core-shellC@Fe<sub>3</sub>C/Fe at 0.1 V and 3 V. **c, d** The C 1s XPS spectra of the SEI in 1 M LiPF<sub>6</sub>/EC+DMC+EMC electrolyte after various etching times at 0.1 V and 3 V, respectively (the surface at 0 s).

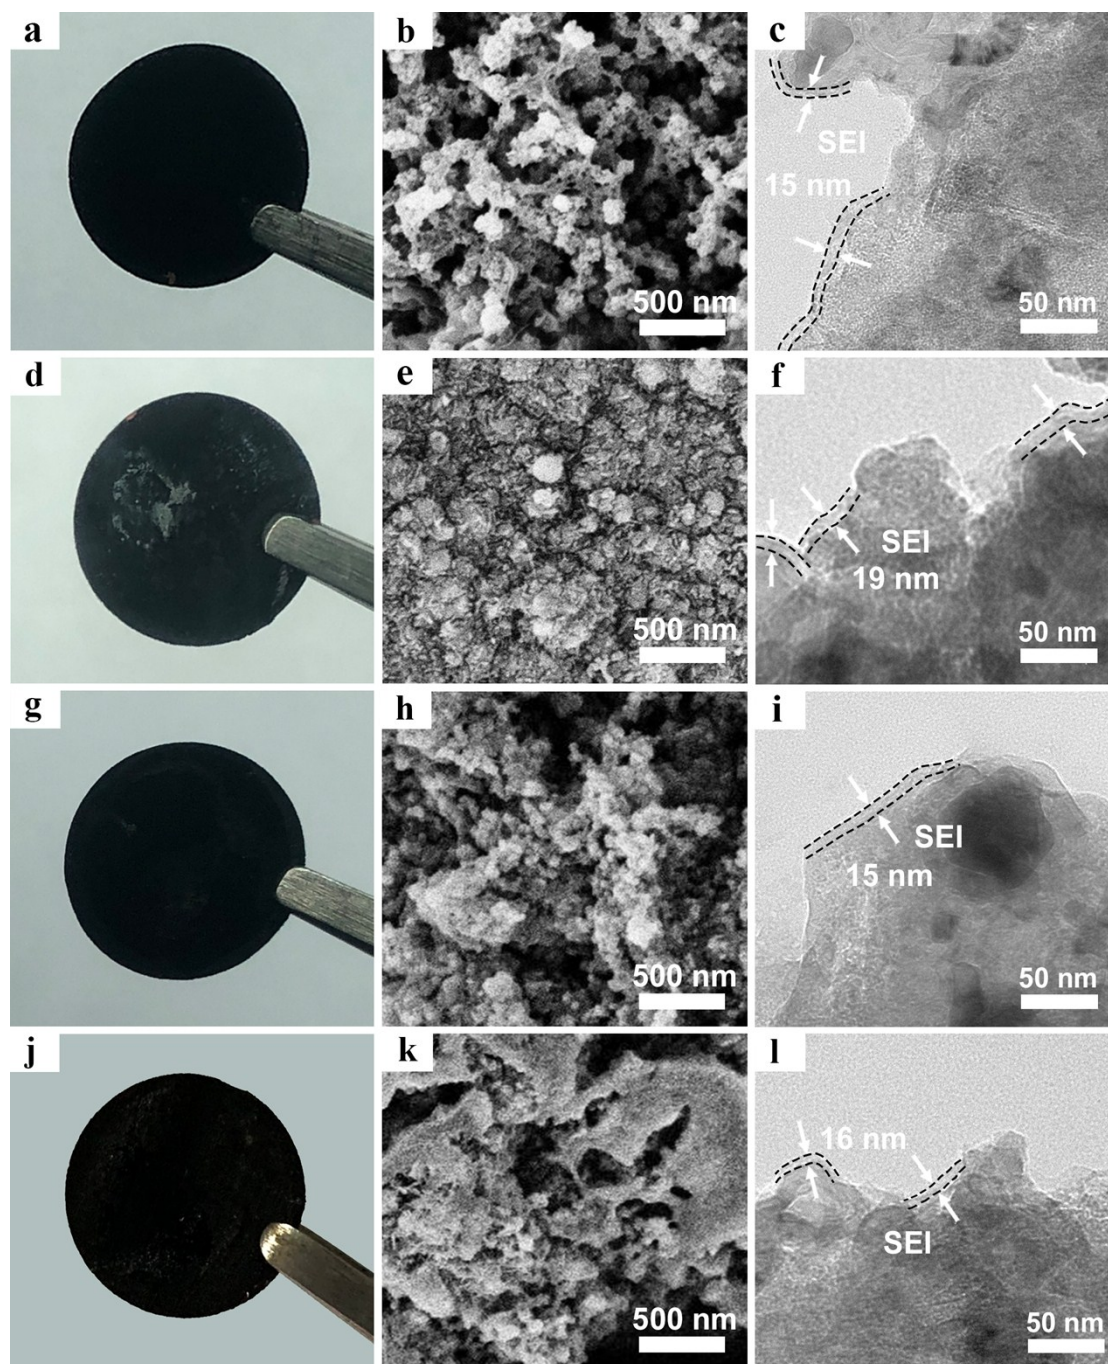

**Supplementary Figure 13** | Digital photos, SEM and TEM images of the post-cycle C@Fe<sub>3</sub>C/Fe anodes with **a-c**, 1 M LiPF<sub>6</sub>/EC+DMC+EMC electrolyte, **d-f**, 2 M LiPF<sub>6</sub>/EC+DMC+EMC electrolyte, **g-i**, 1 M LiClO<sub>4</sub>/EC+DMC+EMC electrolyte and **j-l**, 1 M LiPF<sub>6</sub>/EC+DMC+EMC+DEC electrolyte.

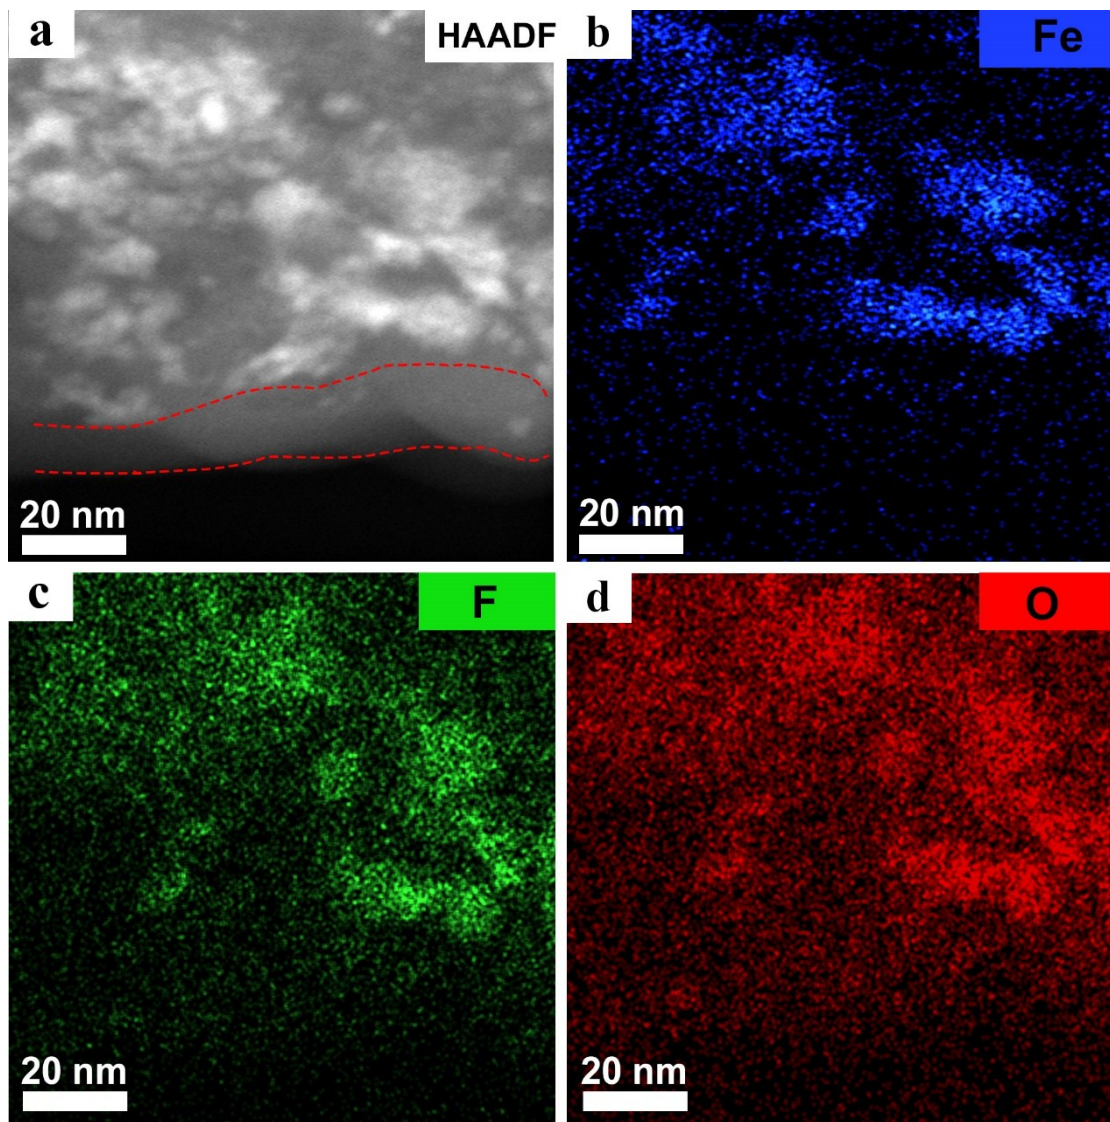

**Supplementary Figure 14** | **a**, HAADF image and corresponding **b**, Fe, **c**, F and **d**, O mapping images of C@Fe<sub>3</sub>C/Fe anode after cycling. The F mapping image is attributed to LiF, FeF<sub>2</sub> and FeF<sub>3</sub>, and the O mapping image is attributed to Li<sub>2</sub>O, Li<sub>2</sub>CO<sub>3</sub> and polycarbonate (poly(CO<sub>3</sub>)).



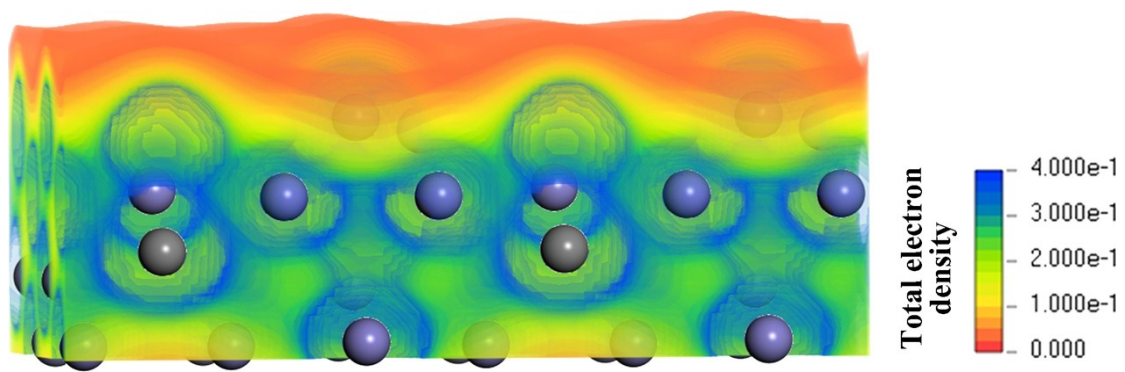

**Supplementary Figure 15** | Electron density map of pristine Fe<sub>3</sub>C.

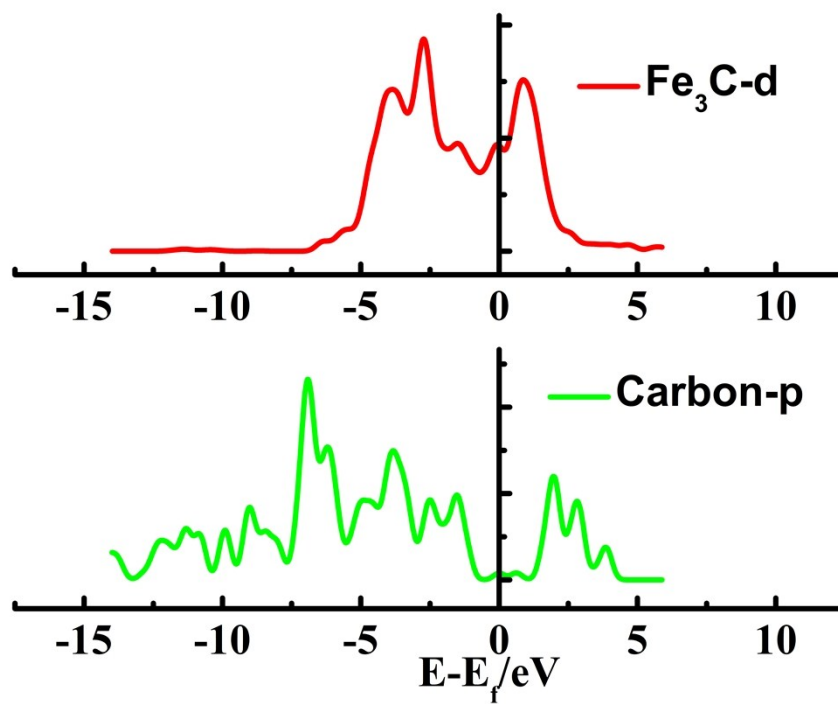

**Supplementary Figure 16** | The PDOS comparison between carbon and Fe<sub>3</sub>C.

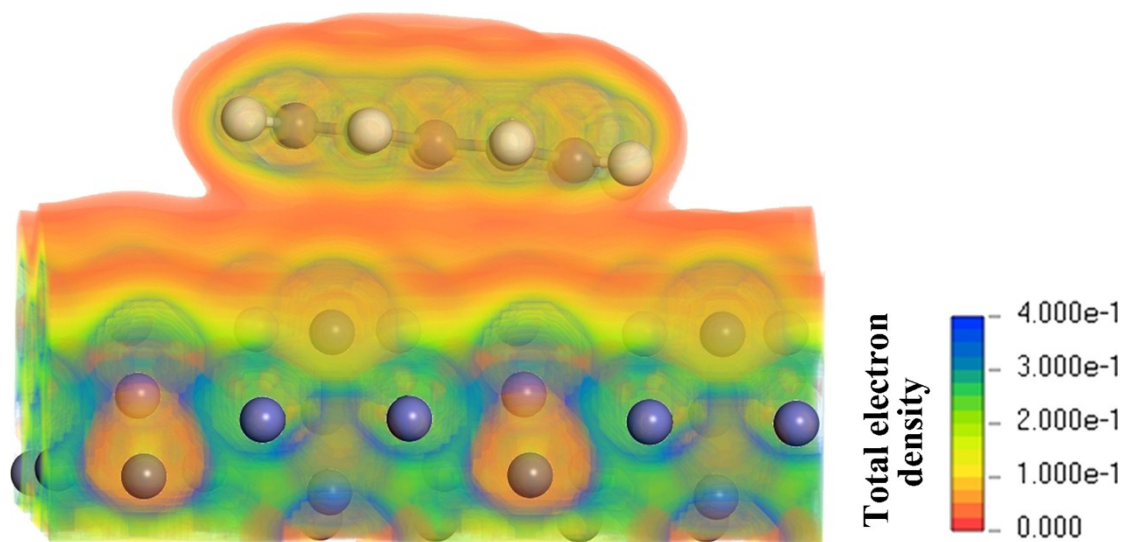

Supplementary Figure 17 | Electron density map of carbon on Fe<sub>3</sub>C.

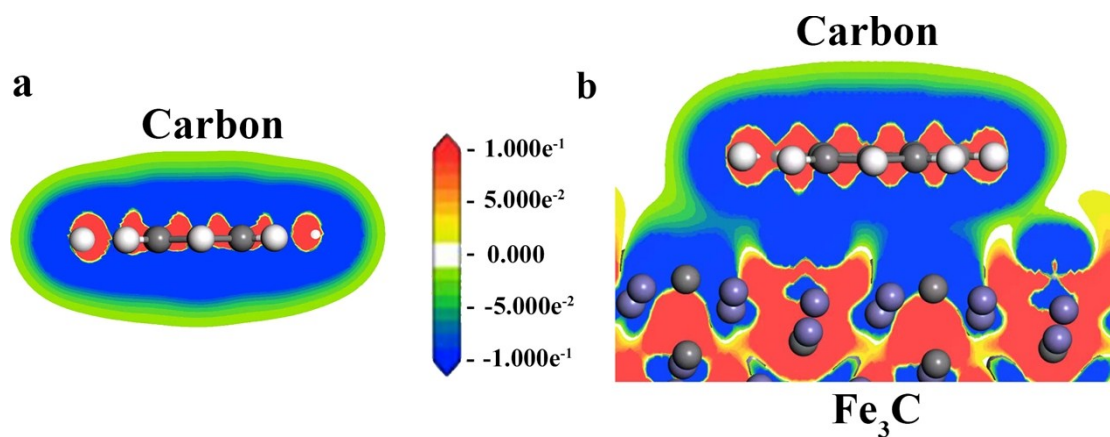

**Supplementary Figure 18** | Electron density difference mapping for **a**, carbon and **b**, C@Fe<sub>3</sub>C.

Red and blue regions indicate charge increase and decrease, respectively.

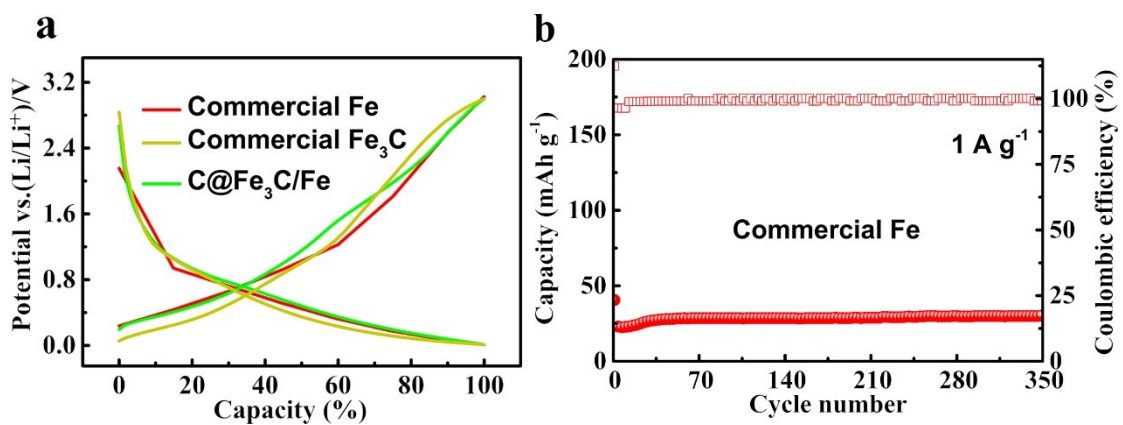

**Supplementary Figure 19 | a**, Charge/discharge profiles of commercial Fe, commercial Fe<sub>3</sub>C and C@Fe<sub>3</sub>C/Fe electrodes. The charge/discharge capacities are normalized for comparison. **b**, Cyclic performance of commercial Fe electrode.

**Table 1**

**Table 1. Extra capacity phenomena of various materials and corresponding explanations**

| Composition                              | structure                       | Current density<br>(mA g <sup>-1</sup> ) | Cycles | capacity<br>(mAh g <sup>-1</sup> ) | Test conditions                                 | explanations                                                                                                               | Ref. No |
|------------------------------------------|---------------------------------|------------------------------------------|--------|------------------------------------|-------------------------------------------------|----------------------------------------------------------------------------------------------------------------------------|---------|
| $\alpha$ -Fe <sub>2</sub> O <sub>3</sub> | Hollow nanofibers               | 60                                       | 40     | 1293                               | 1 M LiPF <sub>6</sub><br>+EC/DEC<br>(1:1)       | The formation of SEI film<br>Lithium storage at the metal-Li <sub>2</sub> O phase boundary constructed by iron particles   | 1       |
| Co <sub>3</sub> O <sub>4</sub>           | Single-crystalline nanobelts    | 100                                      | 60     | 980                                | 1 M LiPF <sub>6</sub><br>+EC/DME<br>(1:1)       | Additional lithium storage in the grain boundaries of Li <sub>2</sub> O and metal formed in the reduction cycle            | 2       |
| Co <sub>3</sub> O <sub>4</sub>           | Graphene-anchored nanoparticles | 50                                       | 30     | 935                                | 1 M LiPF <sub>6</sub><br>+EC/DMC<br>(1:1)       | The grain boundary area of the nanosized Co <sub>3</sub> O <sub>4</sub> particles                                          | 3       |
| MoS <sub>2</sub>                         | 1T(octahedral)                  | 1000                                     | 800    | ~1800                              | 1 M LiPF <sub>6</sub><br>+EC/DMC<br>(6:4)       | The generation of Mo atoms and its subsequent reversible reaction with Li to form Mo/Li <sub>x</sub>                       | 4       |
| CoCO <sub>3</sub>                        | Graphene-coated mesoporous      | 100                                      | 100    | 1070                               | 1 M LiPF <sub>6</sub><br>+EC/DMC/EMC<br>(1:1:1) | The reduction of Li <sub>2</sub> CO <sub>3</sub> to Li <sub>x</sub> C <sub>2</sub> with the formation of Li <sub>2</sub> O | 5       |

|                                           |                           |      |     |      |                                                 |                                                                                                      |    |
|-------------------------------------------|---------------------------|------|-----|------|-------------------------------------------------|------------------------------------------------------------------------------------------------------|----|
| FeCO <sub>3</sub>                         | Nanosized cube-like       | 200  | 130 | 761  | 1 M LiPF <sub>6</sub><br>+EC/DMC<br>(1:1)       | C <sup>4+</sup> in CO <sub>3</sub> <sup>2-</sup> is reduced to C <sup>0</sup> or other low-valence C | 6  |
| N-doped graphene/<br>Fe-Fe <sub>3</sub> C | Nanocomposite             | 1000 | 100 | 607  | 1 M LiPF <sub>6</sub><br>+EC/DMC/EMC<br>(1:1:8) | The growth and decomposition of a polymer/gel-like film                                              | 7  |
| Fe/Fe <sub>3</sub> C-<br>CNFs             | Nanofibers                | 200  | 70  | 500  | 1 M LiPF <sub>6</sub><br>+EC/DMC/EMC<br>(1:1:1) | The growth and decomposition of a polymer/gel-like film                                              | 8  |
| N-<br>Fe/Fe <sub>3</sub> C@<br>C          | Nanomeshes                | 3600 | 500 | 819  | 1 M LiPF <sub>6</sub><br>+EC/EMC/DEC<br>(4:3:3) | The growth and decomposition of a polymer/gel-like film                                              | 9  |
| Fe-<br>Fe <sub>3</sub> C@rG<br>O          | Nanofibers                | 1500 | 200 | 558  | 1 M LiPF <sub>6</sub><br>+EC/DMC/EMC<br>(1:1:1) | The growth and decomposition of a polymer/gel-like film                                              | 10 |
| Fe@Fe <sub>3</sub> C/<br>C                | Core-shell nanocomposites | 50   | 30  | ~500 | 1 M LiPF <sub>6</sub><br>+EC/DMC/EMC<br>(1:1:1) | The growth and decomposition of a polymer/gel-like film                                              | 11 |

## References:

- [1] Chaudhari, S. & Srinivasan, M. 1D hollow  $\alpha$ -Fe<sub>2</sub>O<sub>3</sub> electrospun nanofibers as high performance anode material for lithium ion batteries. *Journal of Materials Chemistry*. **22**, 23049-23056 (2012).
- [2] Huang, H., Zhu, W., Tao, X., Xia, Y., Yu, Z., Fang, J., Gan, Y. & Zhang, W. Nanocrystal-constructed mesoporous single-crystalline Co<sub>3</sub>O<sub>4</sub> nanobelts with superior rate capability for advanced lithium-ion batteries. *ACS Applied Materials & Interfaces* **4**, 5974-5980 (2012).
- [3] Wu, Z.-S., Ren, W., Wen, L., Gao, L., Zhao, J., Chen, Z., Zhou, G., Li, F. & Cheng, H.-M. Graphene anchored with Co<sub>3</sub>O<sub>4</sub> nanoparticles as anode of lithium ion batteries with enhanced reversible capacity and cyclic performance. *ACS Nano* **4**, 3187-3194 (2010).
- [4] Wang, L., Zhang, Q., Zhu, J., Duan, X., Xu, Z., Liu, Y., Yang, H. & Lu, B. Nature of extra capacity in MoS<sub>2</sub> electrodes: molybdenum atoms accommodate with lithium. *Energy Storage Mater.* **16**, 37-45 (2019).
- [5] Ding, Z., Yao, B., Feng, J. & Zhang, J. Enhanced rate performance and cycling stability of a CoCO<sub>3</sub>-polypyrrole composite for lithium ion battery anodes. *Journal of Materials Chemistry A* **1**, 11200-11209 (2013).
- [6] Zhang, C., Liu, W., Chen, D., Huang, J., Yu, X., Huang, X. & Fang, Y. One step hydrothermal synthesis of FeCO<sub>3</sub> cubes for high performance lithium-ion battery anodes. *Electrochimica Acta* **182**, 559-564 (2015).
- [7] Tan, Y., Zhu, K., Li, D., Bai, F., Wei, Y. & Zhang, P. N-doped graphene/Fe-Fe<sub>3</sub>C nano-composite synthesized by a Fe-based metal organic framework and its anode performance in lithium ion batteries. *Chemical Engineering Journal*. **258**, 93-100 (2014).
- [8] Li, J., Wen, W., Xu, G., Zou, M., Huang, Z. & Guan, L. Fe-added Fe<sub>3</sub>C carbon nanofibers as anode for Li ion batteries with excellent low-temperature performance. *Electrochimica Acta* **153**, 300-305 (2015).
- [9] Zhou, J., Qian, T., Yang, T., Wang, M., Guo, J. & Yan, C. Nanomeshes of highly crystalline nitrogen-doped carbon encapsulated Fe/Fe<sub>3</sub>C electrodes as ultrafast and stable anodes for Li-ion batteries. *Journal of Materials Chemistry A* **3**, 15008-15014 (2015).
- [10] Joshi, B., Lee, J.-G., Samuel, E., Jo, H. S., Kim, T.-G., Swihart, M. T., Yoon, W. Y. & Yoon, S. S. Supersonically blown reduced graphene oxide loaded Fe-Fe<sub>3</sub>C nanofibers for lithium ion battery anodes. *Journal of Alloys and Compounds* **726**, 114-120 (2017).
- [11] Su, L., Zhou, Z. & Shen, P. Core-shell Fe@Fe<sub>3</sub>C/C nanocomposites as anode materials for Li ion batteries. *Electrochimica Acta* **87**, 180-185 (2013).
